# Supplementary material for: Minding the gap: learning and visual scanning behaviour in nocturnal bull ants
Source: Oxford University Press journal article supplement (doi:10.1242/jeb.242245), 2021-06-18
Supplement: jeb242245supp.pdf [file jeb242245supp.pdf]

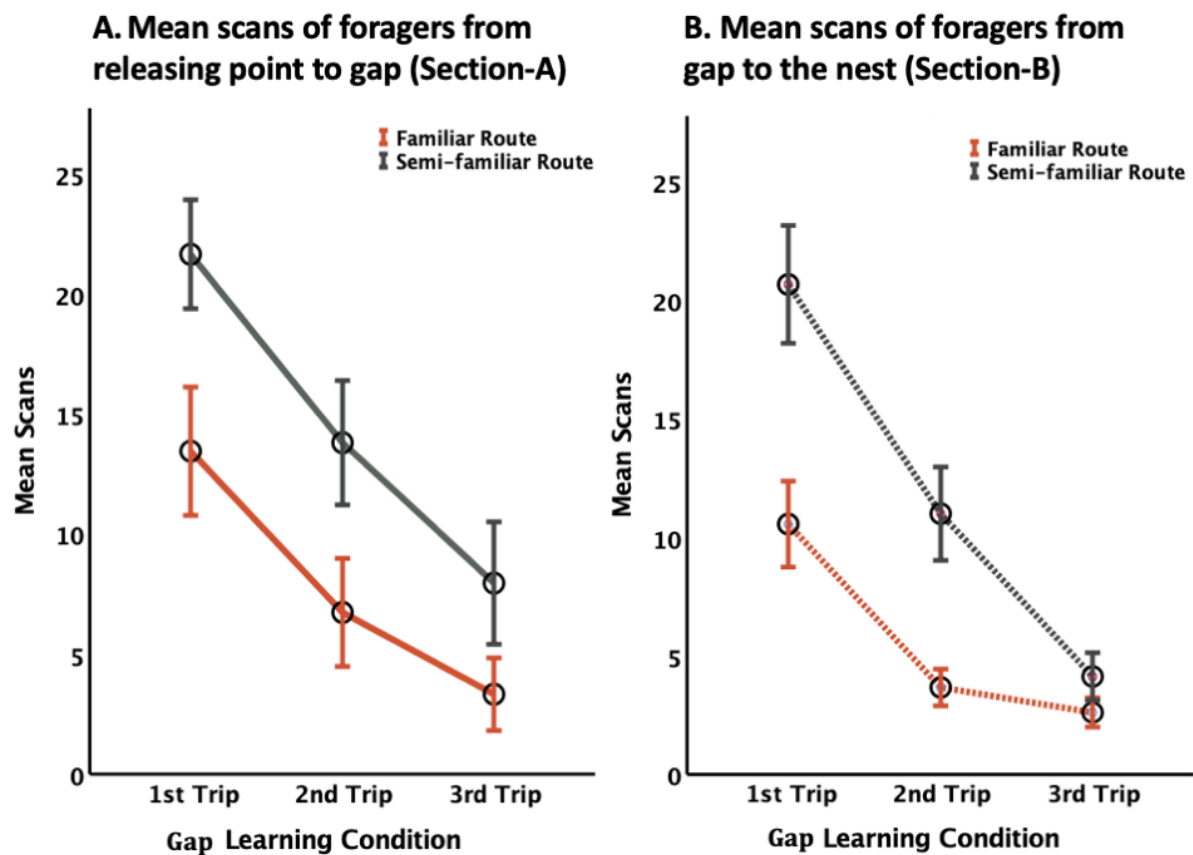

**Fig. S1.** Mean number of scan of foragers in Section-A and Section-B on Gap Learning trials in the Familiar and Semi-familiar environments. Error bars indicate the 95% confidential intervals about the mean.
